# Supplementary material
Source: PubMed Central journal article supplement (PMC9302164)
Supplement: iai.00035-22-s0001.pdf [file iai.00035-22-s0001.pdf]

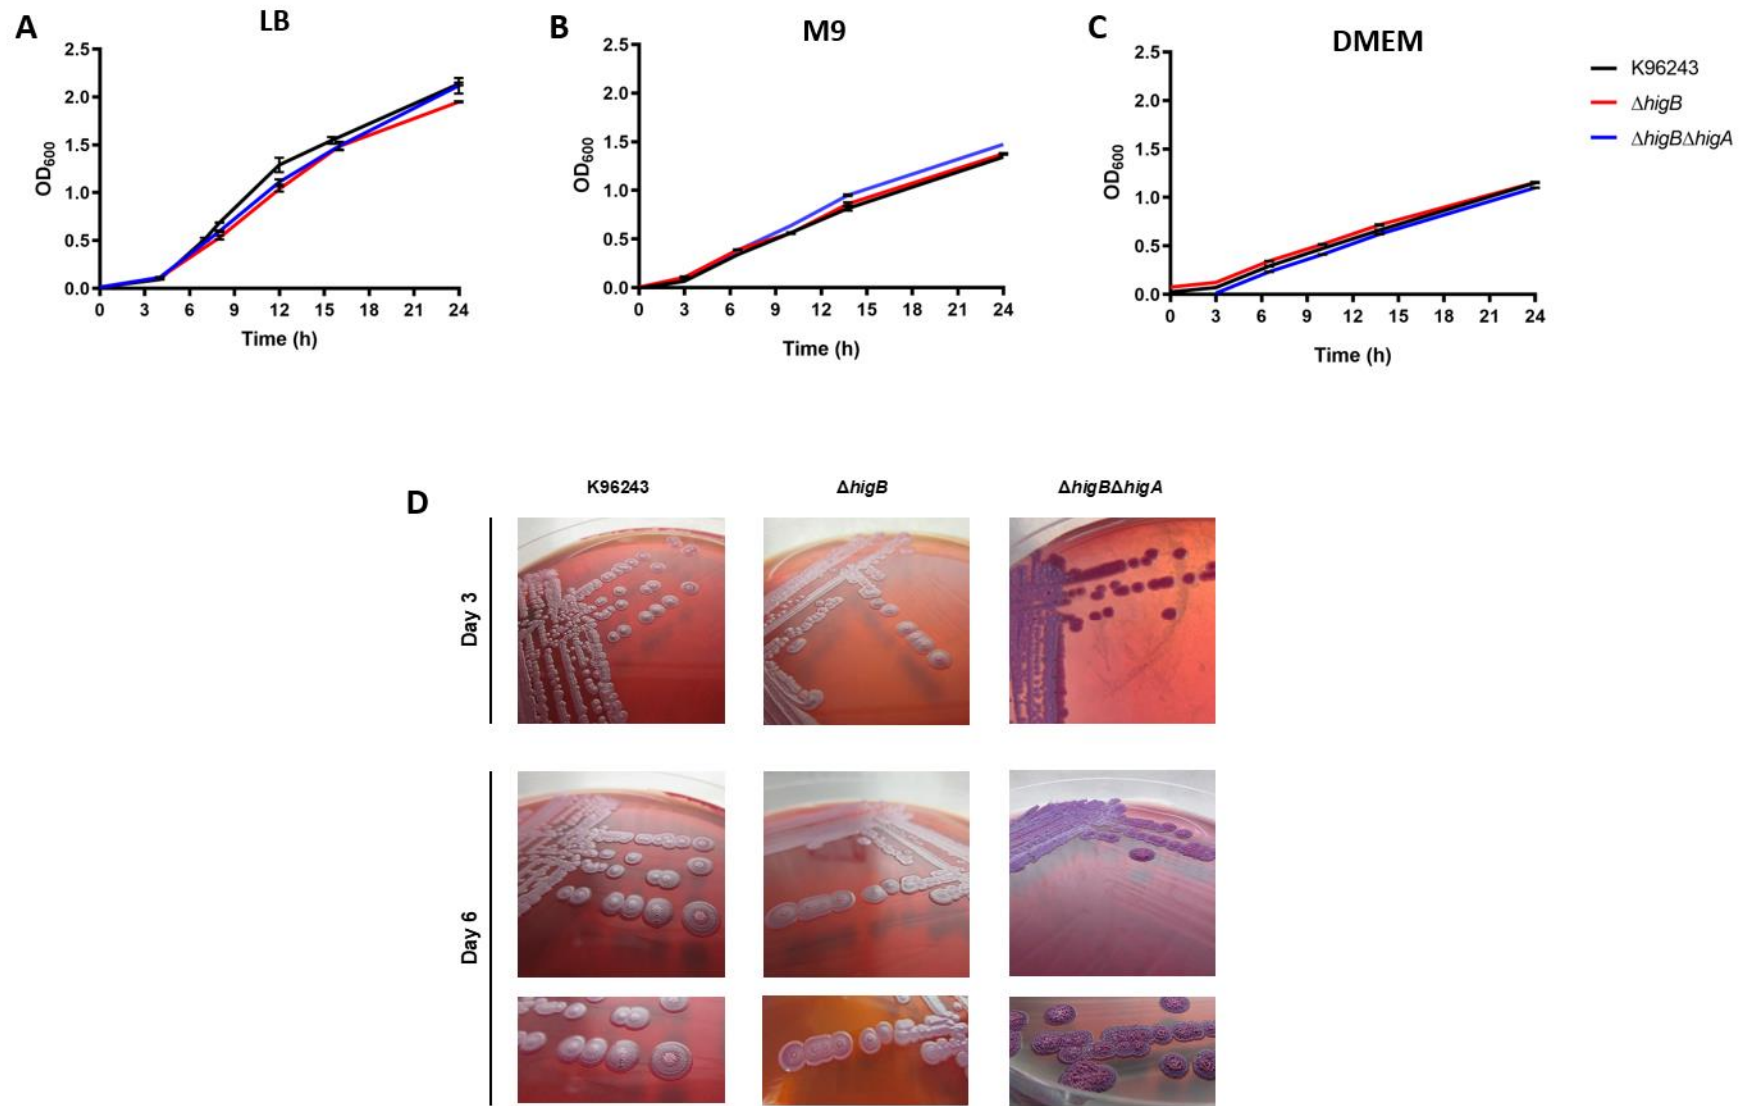

**Figure S1. Growth curves and phenotypic characterization of wild type K96243 and two isogenic mutants. A)** Growth curves in LB; **B)** minimal M9 media; and **C)** DMEM. **(A,B,C)** Black lines represent K96243 WT, red lines  $\Delta higB$ , and blue lines  $\Delta higB \Delta higA$ . **D)** Colony morphology in Ashdown's selective media.

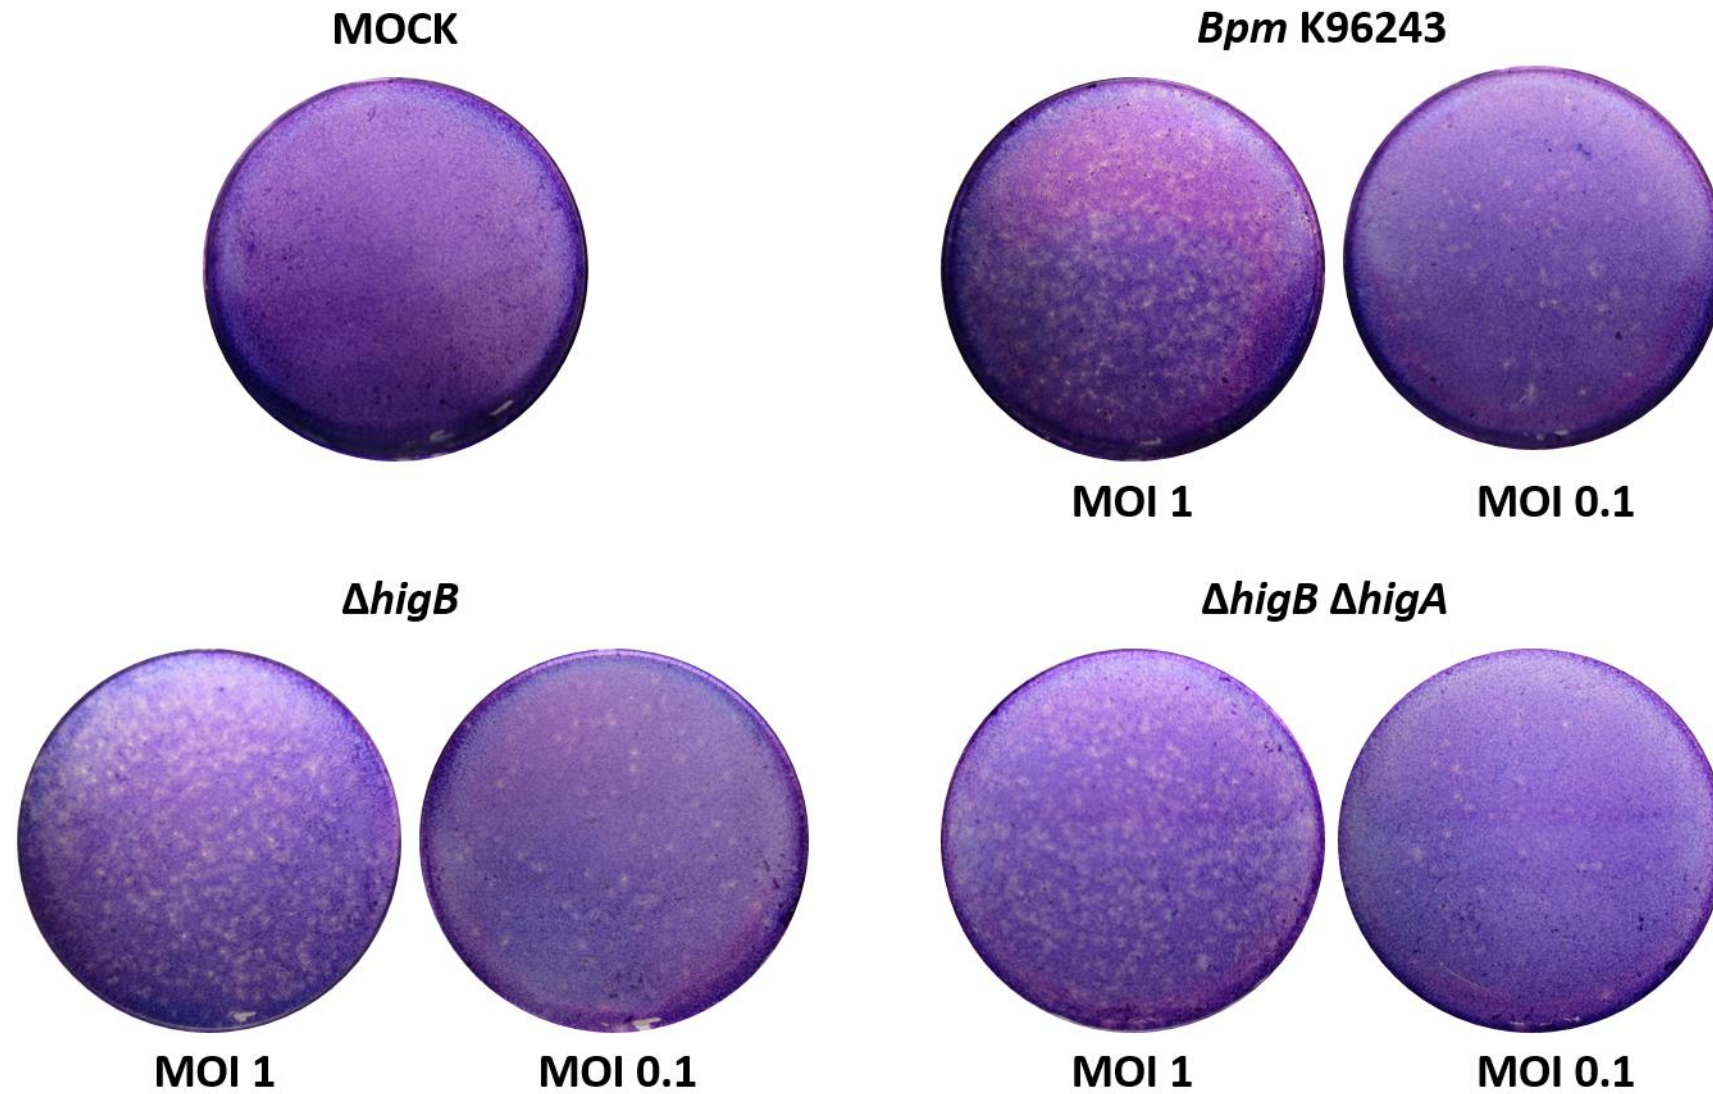

**Figure S2. Plaque forming of isogenic mutants in HeLa cells.** Monolayer of epithelial cells were infected with the wild type K96243 or the isogenic mutants  $\Delta higB$  and  $\Delta higB \Delta higA$  at MOIs of 1 or 0.1 to evaluate their ability to form plaques *in vitro*.
